1 **Geminiviral genomes encode additional proteins with specific subcellular localizations**  
2 **and virulence function**

3 Pan Gong<sup>1\*</sup>, Huang Tan<sup>2,3\*</sup>, Siwen Zhao<sup>1</sup>, Hao Li<sup>1</sup>, Hui Liu<sup>4</sup>, Yu Ma<sup>2,3</sup>, Xi Zhang<sup>2,3</sup>, Junjie Rong<sup>2,3</sup>,  
4 Xing Fu<sup>2</sup>, Rosa Lozano-Durán<sup>2,5#</sup>, Fangfang Li<sup>1#</sup>, Xueping Zhou<sup>1,4#</sup>

5 <sup>1</sup>State Key Laboratory for Biology of Plant Diseases and Insect Pests, Institute of Plant Protection, Chinese  
6 Academy of Agricultural Sciences, Beijing, 100193, China <sup>2</sup>Shanghai Center for Plant Stress Biology, CAS  
7 Center for Excellence in Molecular Plant Sciences, Chinese Academy of Sciences, Shanghai 201602,  
8 China. <sup>3</sup>University of the Chinese Academy of Sciences, Beijing 100049, China. <sup>4</sup>State Key Laboratory of  
9 Rice Biology, Institute of Biotechnology, Zhejiang University, Hangzhou, Zhejiang, 310058, China  
10 <sup>5</sup>Department of Plant Biochemistry, Centre for Plant Molecular Biology (ZMBP), Eberhard Karls University,  
11 D-72076 Tübingen, Germany.

12 \*These authors contributed equally to this work.

13 #Co-corresponding authors: Rosa Lozano-Durán ([rosa.lozano-duran@uni-tuebingen.de](mailto:rosa.lozano-duran@uni-tuebingen.de); [lozano-](mailto:lozano-duran@psc.ac.cn)  
14 [duran@psc.ac.cn](mailto:lozano-duran@psc.ac.cn)); Fangfang Li ([lifangfang@caas.cn](mailto:lifangfang@caas.cn)); Xueping Zhou ([zzhou@zju.edu.cn](mailto:zzhou@zju.edu.cn)).

15

16 **ABSTRACT**

17 Geminiviruses are plant viruses with limited coding capacity. Geminivirus-encoded proteins were  
18 identified applying a 10-kDa arbitrary threshold; however, it is increasingly clear that small  
19 proteins play relevant roles in biological systems, which calls for the reconsideration of this  
20 criterion. Here, we show that geminiviral genomes contain additional ORFs. Using tomato yellow  
21 leaf curl virus, we demonstrate that some of these novel ORFs are expressed during the infection,  
22 and that the encoded proteins display specific subcellular localizations. We prove that the largest  
23 of these new ORFs, which we name V3, is required for full viral infection, and that the V3 protein  
24 localizes in the Golgi apparatus and functions as an RNA silencing suppressor. These results  
25 imply that the repertoire of geminiviral proteins can be expanded, and that getting a  
26 comprehensive overview of the molecular plant-geminivirus interactions will require the detailed  
27 study of small ORFs so far neglected.

## 28 INTRODUCTION

29 Viruses are intracellular parasites that heavily rely on the host cell machinery to complete their  
30 life cycle. Most viruses have small genome sizes, with the concomitant limitation in coding  
31 capacity; in order to overcome the restrictions imposed by their reduced proteome, viruses have  
32 evolved to encode multifunctional proteins that efficiently target hub proteins in their host cells  
33 (reviewed in Brito and Pinney, 2017; King et al., 2018). Nevertheless, higher numbers of virus-  
34 encoded proteins might enable more sophisticated infection mechanisms, and therefore  
35 maximization of the coding space would be expected to be an advantage to the pathogen.

36 Geminiviruses are a family of plant viruses with circular, single-stranded (ss) DNA genomes  
37 causing devastating diseases in crops around the globe. This family includes nine genera, based  
38 on host range, insect vector, and genome structure: *Becurtovirus*, *Begomovirus*, *Curtovirus*,  
39 *Eragrovirus*, *Mastrevirus*, *Topocuvirus*, *Turncurtovirus*, *Capulavirus*, and *Grablovirus* (Zerbini et  
40 al., 2017); most species described to date belong to the genus *Begomovirus*. Members of this  
41 family have small genomes, composed of one or two DNA molecules of less than 3 Kb each, in  
42 which the use of coding space is optimized by bidirectional and partially overlapping open reading  
43 frames (ORFs): in one <3 Kb molecule, geminiviruses contain up to 7 ORFs, with a known  
44 maximum of 8 viral proteins per species. The geminiviral infection cycle is complex, and multiple  
45 steps remain to be fully elucidated. Following transmission by an insect vector, the geminiviral  
46 DNA genome must be released from the virion and reach the nucleus, where it will be converted  
47 into a double-stranded (ds) DNA replicative intermediate; this dsDNA molecule will serve as  
48 template for the transcription of viral genes, including the replication-associated protein (Rep),  
49 which reprograms the cell cycle and recruits the host DNA replication machinery. Rolling-circle  
50 replication ensues, by which new ssDNA copies of the viral genome are produced. Eventually,  
51 the virus must move intracellularly, intercellularly, and systemically, invading new cells and  
52 making virions available for acquisition by the vector. In order to accomplish a successful infection,  
53 geminiviruses must tailor the cellular environment to favour their replication and spread; for this  
54 purpose, they modify the transcriptional landscape of the infected cell, re-direct post-  
55 transcriptional modifications, and interfere with hormone signalling, among other things (reviewed  
56 in Aguilar et al., 2020; Kumar, 2019; Liu et al., 2021), ultimately suppressing anti-viral defences,  
57 creating conditions favourable to viral replication, and manipulating plant development. Although  
58 geminivirus-encoded proteins are described as multifunctional, how the plethora of tasks required  
59 for a fruitful infection can be performed by only 4-8 proteins is an intriguing biological puzzle.

60 Whether members of this family encode additional small proteins, below the arbitrary 10 kDa  
61 threshold established following identification of the first geminivirus species, remains elusive.

62 Tomato yellow leaf curl virus (TYLCV) is a monopartite begomovirus, causal agent of the  
63 destructive tomato leaf curl disease (Basak, 2016). The TYLCV genome contains six known open  
64 reading frames (ORFs), encoding the capsid protein (CP)/V1 and V2 in the virion strand, and  
65 C1/Rep, C2, C3, and C4 in the complementary strand. Rep creates a cellular environment  
66 permissive for viral DNA replication and attracts the DNA replication machinery to the viral  
67 genome (reviewed in Hanley-Bowdoin et al., 2013); C2 suppresses post-transcriptional gene  
68 silencing (PTGS) (Luna et al., 2012), protein ubiquitination (Lozano-Duran et al., 2011) and  
69 jasmonic acid (JA) signalling (Lozano-Duran et al., 2011; Rosas-Diaz et al., 2016); C3 interacts  
70 with PCNA, NAC, and the regulatory subunits of DNA polymerases  $\alpha$  and  $\delta$  to enhance viral  
71 replication (Castillo et al., 2003; Settlege et al., 2005; Wu et al., 2020); C4 is a symptom  
72 determinant, interferes with the intercellular movement of PTGS, and hampers salicylic acid (SA)-  
73 dependent defences (Luna et al., 2012; Medina-Puche et al., 2020; Rosas-Diaz et al., 2018); the  
74 CP forms the viral capsid and is essential for the transmission by the insect vector, and shuttles  
75 the viral DNA between the nucleus and the cytoplasm (Azzam et al., 1994; Diaz-Pendon et al.,  
76 2010; Gotz et al., 2012; Kunik et al., 1998; Ohnesorge and Bejarano, 2009; Palanichelvam et al.,  
77 1998; Rojas et al., 2001; Rubinstein and Czosnek, 1997); V2 is a strong suppressor of PTGS as  
78 well transcriptional gene silencing (TGS), and it mediates the nuclear export of CP (Wang et al.,  
79 2014; Wang et al., 2018; Wang et al., 2020; Zhao et al., 2020; Zrachya et al., 2007). Interestingly,  
80 a recent report identified 21 transcription initiation sites within the TYLCV genome by taking  
81 advantage of cap-snatching by rice stripe virus (RSV) in the experimental *Solanaceae* host  
82 *Nicotiana benthamiana*, suggesting that transcripts beyond those encoding these known ORFs  
83 might exist (Lin et al., 2017). This idea is further indirectly supported by the fact that attempts at  
84 knocking-in tags in geminiviral genomes have so far been fruitless.

85 Here, we report that geminiviral genomes contain additional ORFs besides the canonical ones  
86 described to date. These previously neglected ORFs frequently encode proteins that are  
87 phylogenetically conserved. Using the geminivirus TYLCV as an example, we show that some of  
88 these ORFs are transcribed during the viral infection, and that the proteins they encode  
89 accumulate in the plant cell and show specific subcellular localizations and distinctive features.  
90 Moreover, we demonstrate that one of these novel ORFs, which we have named V3 and is  
91 conserved in begomoviruses, is essential for full infectivity in *N. benthamiana* and tomato, and  
92 encodes a Golgi-localized protein that acts as a suppressor of PTGS and TGS. Taken together,

93 our results indicate that geminiviruses encode additional proteins to the ones described to date,  
94 which may largely expand the geminiviral proteome and its intersection with the host cell.

95

## 96 **RESULTS**

### 97 **The TYLCV genome contains additional conserved open reading frames**

98 It is increasingly clear that small proteins (<100 aa) are prevalent in eukaryotes, including plants,  
99 and have biological functions (reviewed in Eguen et al., 2015; Hsu and Benfey, 2018; Murphy et  
100 al., 2012). In order to explore whether geminiviral genomes may contain additional ORFs  
101 encoding small proteins of predictable functional relevance, we designed a tool that we called  
102 ViralORFfinder; this tool uses the ORFfinder from NCBI (<https://www.ncbi.nlm.nih.gov/orffinder/>)  
103 to identify ORFs in an inputted subset of DNA sequences (geminiviral genomes, in this case) and  
104 creates a small database with the translated protein sequences, which can be used to BLAST a  
105 protein of choice, therefore assessing conservation among the selected species (Figure 1a). The  
106 distribution of the protein of interest is then displayed in a phylogenetic tree of the inputted viral  
107 species, generated based on the DNA sequences provided. Using ViralORFfinder, additional  
108 ORFs can be consistently predicted in geminiviruses of different genera, as illustrated for bipartite  
109 begomoviruses (Supplementary figure 1; Supplementary table 2), curtoviruses (Supplementary  
110 figure 2; Supplementary table 3), and mastreviruses (Supplementary figure 3; Supplementary  
111 table 4); the proteins encoded by some of these ORFs are conserved among species.

112 We then used ViralORFfinder to identify additional proteins encoded by monopartite  
113 begomoviruses causing tomato leaf curl disease isolated from different regions of the world (see  
114 Methods section; Supplementary figure 4; Supplementary table 5), and identify those present in  
115 TYLCV and conserved in other species. As shown in Figure 1b, 43 ORFs encoding proteins of >10  
116 aa were identified in the TYLCV genome. Interestingly, a significant correlation can be found  
117 between the size of the encoded proteins and their representation in the selected subset of  
118 species, with the six larger proteins (>10 kDa) present in all of them (Supplementary figure 4b,  
119 pink). For further analyses, we selected the 6 ORFs that followed in size and prevalence  
120 (Supplementary figure 4b, blue), named ORF1-6; the position of these ORFs in the TYLCV  
121 genome is shown in Figure 1c. Of note, the proteins encoded by these ORFs are also conserved  
122 in other members of the *Begomovirus* genus, both bipartite and monopartite, infecting a broad  
123 range of hosts (Supplementary figures 5-7; Supplementary table 6; Figure 1d).

124

125 **The novel ORFs in TYLCV encode proteins with predicted domains and specific**  
126 **subcellular localizations**

127 With the aim of gaining insight into the properties of the proteins encoded by the new ORFs from  
128 TYLCV, we investigated the presence in their sequence of predicted domains or signals, namely  
129 transmembrane domains (TM), nuclear localization signal (NSL), and chloroplast transit peptide  
130 (cTP). As shown in Figure 2a, while none of these proteins contains an NLS, and only one of  
131 them contains a cTP, three of them contain a predicted TM, which is not present in any of the  
132 previously characterized proteins.

133 We then cloned ORF1-6, fused them to the GFP gene, and transiently expressed them in *N.*  
134 *benthamiana* leaves; confocal microscopy indicates that these fusion proteins present specific  
135 subcellular localizations (Figure 2b). Whereas the ORF1-encoded protein is mostly nuclear, co-  
136 expression with marker proteins or dyes unveils that the ORF2-encoded protein localizes in the  
137 endoplasmic reticulum (ER), as demonstrated by the co-localization with RFP-HDEL; the ORF3-  
138 encoded protein in mitochondria, as demonstrated by the co-localization with MitoTracker; the  
139 ORF4-encoded protein in the ER and the Golgi apparatus, as demonstrated by the partial co-  
140 localization with RFP-HDEL and SYP32-RFP; and the ORF5- and ORF6-encoded proteins mostly  
141 in Golgi, as demonstrated by the partial co-localization with SYP32-RFP (Figure 2c-g;  
142 Supplementary figure 8). The specific subcellular localization exhibited by each of these proteins  
143 suggests that, despite their small size (5.3-9.3 kDa; Figure 2a), either their sequence contains the  
144 appropriate targeting signals, or they interact with plant proteins that enable their precise targeting  
145 in the cell.

146 A prerequisite for these ORFs to have a biological function is their expression in the context of  
147 the viral infection. Therefore, we cloned the TYLCV genomic sequences upstream of each ATG  
148 (pORF1-6) before the GFP reporter gene and tested their promoter activity in transiently  
149 transformed *N. benthamiana* leaves. As shown in Supplementary figure 9, none of these  
150 sequences could drive GFP expression in the absence of the virus, but pORF1, pORF2, pORF4,  
151 and pORF5 could when the virus was present; the sequence upstream of the C4 ORF was used  
152 as positive control, and could activate GFP expression both in the presence and absence of  
153 TYLCV. The promoter activity of these upstream sequences in infected cells strongly suggests  
154 that at least ORF1, 2, 4, and 5 are expressed during the viral infection.

155

156 **The novel V3 protein from TYLCV is a Golgi-localized silencing suppressor required for**  
157 **full infection**

158 ORF6 is the largest of the newly described ORFs in the TYLCV genome, and the protein it  
159 encodes displays the highest degree of conservation in a selected subset of 26 representative  
160 begomoviruses (Supplementary figure 7). Therefore, we decided to further characterize this ORF  
161 as a proof-of-concept of the potential biological roles of novel ORFs. Hereafter, ORF6 will be  
162 referred to as V3, since it is the third ORF on the viral strand in the TYLCV genome.

163 The V3 ORF is located in positions 2350-2583 of the TYLCV genome (TYLCV-BJ; Figure 1d),  
164 and encodes a 77-amino acid protein. In different begomovirus species, the V3 ORF ranges from  
165 87 to 234 nt, and the protein it encodes presents a high degree of similarity, with 6 residues  
166 completely conserved (Supplementary figure 7).

167 In order to determine whether V3 is transcribed during the viral infection, we checked if the  
168 corresponding transcript was present in TYLCV-infected samples: as shown in Figure 3a, the V3  
169 transcript was found upon TYLCV infection, but not in uninfected plants. 5' rapid amplification of  
170 cDNA ends (RACE) was then used to identify the transcriptional initiation site of V3, which was  
171 found to be located between 176 and 421 upstream of the start codon (Figure 3b). Interestingly,  
172 most of the sites identified by RACE (7 out of 11) are close to A2058, which was previously  
173 isolated by cap-snatching of RSV (Lin et al., 2017).

174 The finding that a transcript corresponding to the V3 ORF can be identified in infected samples  
175 strongly suggests that the sequence upstream of this ORF must act as a promoter. Since the 500  
176 bp fragment previously tested (Supplementary figure 9) did not show promoter activity, we tested  
177 a larger, 833-nt sequence upstream of the V3 start codon, which was cloned before the GUS or  
178 GFP reporter genes. As shown in Figure 3c, d, this viral sequence could activate GUS expression,  
179 leading to detectable GUS activity, and it could also drive expression of GFP (Figure 3e-g), albeit  
180 more weakly than the 35S promoter. Taken together, these results confirm that the V3 ORF can  
181 be expressed *in planta* from its genomic context.

182 Given that protein function is tightly linked to its spatial location, we then decided to analyse the  
183 subcellular localization of the V3 protein in detail. As can be seen in Figure 3h, V3 is a Golgi-  
184 localized protein; this localization does not change in the presence of the virus (Supplementary  
185 figure 10a). A closer observation confirms that V3 is localized to cis-Golgi, as shown by the co-  
186 localization of V3-GFP with the markers Man49-mCherry and SYP32-RFP (Figure 3h;  
187 Supplementary figure 10b); nevertheless, the YFP fusions YFP-V3 and V3-YFP can also partially



188 co-localize with the endoplasmic reticulum (ER), as indicated by their partial co-localization with  
189 the ER marker mCherry-HDEL or RFP-HDEL (Figure 3h; Supplementary figure 10c, d), which  
190 may reflect the transition of the protein from the ER to the Golgi apparatus.

191 With the aim of assessing the biological relevance of the V3 protein for the TYLCV infection, we  
192 next generated a mutated infectious clone carrying a T2351C substitution in the V3 ATG, hence  
193 impairing the production of the V3 protein. Since the V3 ORF overlaps with the Rep/C1 and C4  
194 ORFs, nt replacements in the start codon of the V3 ORF necessarily affect the protein sequence  
195 of the resulting Rep or C4 proteins; the chosen change results in a I89V substitution in the Rep/C1  
196 protein, with no change in C4. This mutant infectious clone is hereafter referred to as TYLCV-  
197 mV3.

198 TYLCV-mV3 was then inoculated into *N. benthamiana* plants, and its performance compared to  
199 that of the wild-type (WT) virus (TYLCV-WT). At 10 days post-inoculation (dpi), TYLCV-mV3-  
200 infected plants displayed mild leaf curling symptoms and presented lower viral DNA load  
201 compared to plants inoculated with TYLCV-WT (Figure 4a, b), which correlated with a lower  
202 accumulation of CP (Figure 4c). These differences apparently result from a delay in the infection,  
203 measured as symptom appearance (Figure 4d). To evaluate the potential functional impact of the  
204 I89V substitution in Rep/C1 on the viral infection and disentangle this effect to that derived from  
205 the absence of V3, transgenic *N. benthamiana* lines expressing V3-YFP under a 35S promoter  
206 were generated, and a complementation assay was performed. Of note, the V3-expressing plants  
207 do not display obvious developmental abnormalities (Supplementary figure 11a); the expression  
208 of V3-YFP was confirmed by qRT-PCR and western blot (Supplementary figure 11b, c). As shown  
209 in Figure 4e and Supplementary figure 11d, transgenic expression of V3-YFP could fully  
210 complement the lack of V3 in the TYLCV-mV3 clone, measured as incidence and severity of  
211 symptom appearance, indicating that the lower progression of the infection observed upon  
212 inoculation with the V3 null mutant is due to the lack of this protein, and not to a suboptimal  
213 performance of Rep-I89V. Next, we evaluated the virulence of TYLCV-mV3 on tomato, the virus'  
214 natural host. As previously observed in *N. benthamiana*, the lack of V3 resulted in lower viral load  
215 and CP accumulation, and milder symptoms at 10 dpi (Figure 4f-h), confirming that V3 plays a  
216 relevant role in the viral infection that is not restricted to *N. benthamiana*.

217 Heterologous expression from a potato virus X (PVX)-derived vector and quantification of the  
218 impact on PVX pathogenicity is a widely used approach to test virulence activity of viral genes of  
219 interest. Confirming a contribution of V3 to virulence, the presence of this gene in PVX-V3 led to  
220 an exacerbation of disease symptoms compared to PVX alone at 10 and 30 dpi, with a

221 concomitant higher accumulation of the PVX CP at 30 dpi (Supplementary figure 12);  $\beta$ C1, a  
222 symptom determinant encoded by tomato yellow leaf curl China betasatellite, was used as positive  
223 control. Infection by PVX-V3, however, did not lead to H<sub>2</sub>O<sub>2</sub> accumulation or cell death  
224 (Supplementary figure 12c).

225 It has been previously established that a high correlation exists between the ability of a viral  
226 protein to suppress RNA silencing and its capacity to enhance the severity of the PVX infection.  
227 RNA silencing is conserved in eukaryotes, and is considered the main anti-viral defence  
228 mechanism in plants (Ding, 2010; Ding et al., 2004; Jin et al., 2020). Supporting this notion,  
229 virtually all plant viruses described to date encode at least one protein with RNA silencing  
230 suppression activity (Burgyan and Havelda, 2011; Jin et al., 2020). With the aim to test if V3 can  
231 suppress post-transcriptional gene silencing (PTGS), we transiently expressed GFP from a 35S  
232 promoter in leaves of transgenic 16c *N. benthamiana* plants, harbouring a 35S:GFP cassette  
233 (Ruiz et al., 1998), in the presence or absence of V3; the well-described silencing suppressor P19  
234 from tomato bushy stunt virus was used as positive control. At 4 dpi, fluorescence had already  
235 substantially decreased when no viral protein was co-expressed, but was maintained in the  
236 samples with P19 or Myc-V3 (Figure 5a). Western blot and qRT-PCR were used to confirm that  
237 both the GFP protein as well as the corresponding mRNA accumulated to higher levels in tissues  
238 expressing P19 or Myc-V3 (Figure 5b). At 20 dpi, systemic leaves of 16c plants inoculated with  
239 the constructs to express either of the viral proteins remained green, while fluorescence had  
240 disappeared in control plants as a result of systemic silencing (Figure 5a).

241 The ability of V3 to suppress PTGS was further confirmed by expressing this protein from a PVX-  
242 based vector; in this case,  $\beta$ C1, which also functions as silencing suppressor, was used as  
243 positive control. Transient co-transformation of a PVX infectious clone together with a 35S:GFP  
244 cassette in leaves of 16c plants led to weak fluorescence in the infiltrated tissues at 7 dpi, and  
245 systemic silencing at 20 dpi; in stark contrast, co-transformation with PVX- $\beta$ C1 or PVX-V3  
246 resulted in the maintenance of strong fluorescent signal at 7 dpi, and absence of systemic  
247 silencing (Figure 5d). Neither  $\beta$ C1 nor V3 enhanced the local accumulation of PVX, as indicated  
248 by the accumulation of the PVX CP protein (Figure 5e), hence ruling out an indirect effect of these  
249 proteins on the endogenous ability of PVX to suppress silencing. Therefore, our results  
250 demonstrate that V3 from TYLCV can effectively suppress PTGS in plants.

251 Another level of RNA silencing is transcriptional gene silencing (TGS), which acts through  
252 methylation of DNA at cytosine residues; TGS also acts as an anti-viral response in plants, and  
253 is particularly relevant against geminiviruses, which replicate their DNA genomes in the nucleus



254 of the infected cell (Jin et al., 2020; Wang et al., 2019). To investigate whether V3 can also act as  
255 a TGS suppressor, we inoculated 16-TGS plants, in which the GFP transgene is silenced due to  
256 methylation of the 35S promoter (Yang et al., 2011), with PVX or PVX-V3; PVX- $\beta$ C1 was used as  
257 positive control, since  $\beta$ C1 can also act as a TGS suppressor. At 10 dpi, green fluorescence could  
258 be observed in systemic leaves of 16-TGS plants inoculated with PVX- $\beta$ C1 and PVX-V3, as  
259 opposed to mock- or PVX-inoculated plants (Figure 5f); this fluorescence persisted at 28 dpi  
260 (Figure 5g). Visual assessment was confirmed at the molecular level by western blot (Figure 5h,  
261 i), indicating that V3 can also suppress TGS in the host plant.

262 To confirm the effect of V3 on DNA methylation, the level of genome-wide methylation in  
263 transgenic V3-YFP plants was examined by digestion with a methylation-dependent restriction  
264 enzyme, *McrBC* (Stewart et al., 2000). As presented in Figure 5j, genomic DNA from two  
265 independent V3-YFP lines was completely digested by the methylation-independent restriction  
266 endonuclease *DraI*, but only partially digested by *McrBC*, in sharp contrast to the genomic DNA  
267 from WT plants. This indicates a lower level of DNA methylation in transgenic plants expressing  
268 V3, further supporting a function of this viral protein as TGS suppressor.

269 In summary, our results demonstrate that V3 is a newly described protein encoded by TYLCV,  
270 which preponderantly localizes in the cis-Golgi, significantly contributes to virulence, and functions  
271 as a suppressor of both PTGS and TGS.

272

## 273 **DISCUSSION**

274 Geminivirus-encoded proteins have so far been identified taking into consideration an arbitrary  
275 threshold of 10 kDa, below which potential proteins were discarded. However, it is increasingly  
276 clear that small proteins and peptides play relevant roles in biological systems, hence calling for  
277 the reconsideration of this criterion. Here, we show that geminiviral genomes contain additional  
278 ORFs beyond those previously described, at least some of which are conserved within members  
279 of a given genus, hinting at functional relevance. Using TYLCV as a model, we demonstrate that  
280 at least some of these conserved novel ORFs are expressed during the infection, and that the  
281 proteins they encode localize in specific subcellular compartments. Interestingly, in this subset of  
282 selected proteins novel localizations, not described for any of the other TYLCV-encoded proteins,  
283 are represented, including the Golgi apparatus (ORF4, 5, and 6) and mitochondria (ORF 3). Also  
284 of note, some of these proteins (ORF2, 4, and 6) harbor transmembrane domains, which are not  
285 present in any of the “canonical” proteins from TYLCV. These results indicate that the repertoire

286 of geminiviral proteins can be expanded, and that the new additions to the viral proteomes will  
287 most likely perform additional virulence functions and/or employ alternative molecular  
288 mechanisms to those exhibited by the previously described proteins. We might still be, therefore,  
289 far from getting a comprehensive overview of the plant-geminivirus molecular interaction  
290 landscape, which will require the detailed study of potentially multiple small ORFs that have so  
291 far been neglected.

292 In this work, we selected the largest of the new ORFs found in TYLCV, which we name V3, to be  
293 used as a proof-of-concept of the potential functionality of novel viral small proteins. Strikingly,  
294 the lack of V3 negatively impacted the viral infection in two different hosts, *N. benthamiana* and  
295 tomato, demonstrating that V3 has a biological function. However, V3 is not essential, since a V3  
296 null mutant virus can still accumulate and establish a systemic infection.

297 The V3 protein is mostly localized in the cis-Golgi, a novel localization for a geminivirus-encoded  
298 protein. Remarkably, V3 can suppress both PTGS and TGS, an ability that may underlie its  
299 virulence-promoting effect on TYLCV and PVX. One intriguing question is how V3 can exert this  
300 effect from the Golgi apparatus. Interestingly, connections have been drawn between the  
301 endomembrane system and RNA silencing (reviewed in Kim et al., 2014). In the model plant  
302 *Arabidopsis thaliana*, electron microscopy unveiled an enrichment of the Argonaute protein AGO1,  
303 a central player in PTGS, in close proximity to Golgi (Derrien et al., 2012); another Argonaute  
304 protein, AGO7, which has been recently shown to play a role in anti-viral defence (Zheng et al.,  
305 2019), also co-purifies with membranes and concentrates in cytoplasmic bodies linked to the  
306 ER/Golgi endomembrane system (Jouannet et al., 2012). It seems therefore plausible that this  
307 subcellular localization is permissive for a direct targeting of RNA silencing, although further  
308 experiments will be necessary to uncover the exact molecular mechanism underlying this activity  
309 of V3.

310 PTGS and TGS are arguably the main plant defence mechanisms against geminiviruses. This  
311 idea is supported by the fact that, despite limited coding capacity, a given geminivirus species  
312 can produce several proteins that independently target these processes. TYLCV encodes at least  
313 three proteins capable of acting as PTGS suppressors, namely C2, C4, and V2 (Luna et al., 2012;  
314 Rosas-Diaz et al., 2018; Zrachya et al., 2007), and at least two, Rep and V2, capable of  
315 suppressing TGS (Rodriguez-Negrete et al., 2013; Wang et al., 2014; Wang et al., 2018; Wang  
316 et al., 2020); these proteins exert their functions through non-overlapping mechanisms. Only one  
317 of the viral proteins, V2, has been described as a simultaneous suppressor of PTGS and TGS,  
318 as observed for V3. All of these silencing suppressors encoded by TYLCV are essential for the

319 infection, although this may be due to their contribution to additional virulence activities, enabled  
320 by their multifunctional nature. Similarly, it is possible that V3 exerts additional, yet-to-be  
321 described functions during the viral infection.

322 Why a given geminivirus species needs multiple proteins targeting the same pathway is a thought-  
323 provoking question. Since the viral infection is a process, the temporal dimension must be  
324 considered: geminiviral genes can be classified as early or late, depending on the timing of their  
325 expression, with the strongest PTGS and TGS suppressor, V2, being a late gene, probably due  
326 to the requirement of another viral protein, C2, to activate its expression. The V3 promoter was  
327 active in the absence of the infection, which suggests that it can be expressed as an early gene.  
328 The early expression of V3 would guarantee the availability of a PTGS and TGS suppressor  
329 during the time between the synthesis of the dsDNA replicative intermediate and the expression  
330 of V2 later in the cycle, enhancing the effectiveness of viral accumulation and spread.  
331 Nevertheless, further work will be required to acquire a full understanding of the potential breadth  
332 of functions exerted by V3 and of the underpinning molecular mechanisms.

333

## 334 **METHODS**

### 335 **Plant materials**

336 *N. benthamiana* and *Solanum lycopersicum* (tomato) plants were grown in a growth chamber with  
337 60% relative humidity and a 16 h:8 h light:dark, 25°C:18°C regime. The transgenic GFP 16c line  
338 was kindly provided by David C. Baulcombe (University of Cambridge, UK) (Ruiz et al., 1998);  
339 16-TGS plants were described previously (Buchmann et al., 2009); the transgenic RFP-H2B line  
340 was kindly shared by Michael M. Goodin (University of Kentucky, USA) (Martin et al., 2009).

341 The *Agrobacterium tumefaciens* strain EHA105 containing the pEarleygate101:V3-YFP construct  
342 was used to generate 35S:V3-YFP transgenic *N. benthamiana* lines by leaf disc transformation  
343 as previously described (Li et al., 2015).

### 344 **Agroinfiltration and viral inoculation**

345 For *A. tumefaciens*-mediated transient expression in *N. benthamiana*, plasmids were transformed  
346 into the EHA105 strain by the freeze-thaw method (Figures 3a-h lower panel, 4, 5, Supplementary  
347 figure 10b, c, Supplementary figure 12) or to the GV3101 strain through electroporation (Figures  
348 2, 3h upper panel, Supplementary figure 8, Supplementary figure 9, Supplementary figure 10a,  
349 d). *Agrobacterium* cultures were resuspended in infiltration buffer (10 mM MgCl<sub>2</sub>, 10 mM MES

350 (pH 5.6), and 100  $\mu$ M acetosyringone) to an  $OD_{600} = 0.1-0.5$ , then infiltrated into the adaxial side  
351 of four-week-old *N. benthamiana* leaves with a needle-less syringe. For viral inoculation, two-  
352 week-old *N. benthamiana* plants or tomato plants at the two-leaf stage were infiltrated with  
353 *Agrobacterium* cultures carrying the TYLCV-BJ (MN432609) infectious clone. For experiments  
354 that required co-infiltration, *Agrobacterium* suspensions carrying different constructs were mixed  
355 at 1:1 ratio before infiltration.

## 356 **Plasmid construction**

357 Viral open reading frames (ORFs) from the TYLCV (TYLCV-Alm, Accession No. AJ489258)  
358 genome were cloned in the pENTR<sup>TM</sup>/D-TOPO<sup>®</sup> vector (Thermo Scientific) (for ORF1, ORF2,  
359 ORF4, ORF5, ORF6/V3) or the pDONR<sup>TM</sup>/Zeo vector (Thermo Scientific) (for ORF3) without a  
360 stop codon. The binary plasmids to express GFP-fused viral proteins were generated by sub-  
361 cloning (Gateway LR reaction, Thermo Scientific) the viral ORFs from the corresponding entry  
362 vectors into pGWB505 (Nakagawa et al., 2007). To generate the constructs to express V3-YFP,  
363 YFP-V3, or Myc-V3, the full-length V3 ORF was obtained from TYLCV (TYLCV-BJ, Accession No.  
364 MN432609) and recombined into the binary destination vectors pEarleygate101, pEarleygate104,  
365 or pEarleygate203, respectively (Earley et al., 2006). Please note that the V3/ORF6 protein  
366 sequences from TYLCV-Alm and TYLCV-BJ are identical.

367 To generate the construct to express SYP32-RFP (as a cis-Golgi marker), the gene encoding  
368 SYNTAXIN OF PLANTS 32 (SYP32) was amplified from *A. thaliana* cDNA, cloned into the  
369 pENTR<sup>TM</sup>/D-TOPO<sup>®</sup> vector (Thermo Scientific), and sub-cloned into pGWB554 (Nakagawa et al.,  
370 2007) using a Gateway LR reaction (Thermo Scientific). The construct to express RFP-HDEL is  
371 from Liu et al., 2015, and the ones to express mCherry-HDEL and Man49-mCherry are from  
372 Nelson et al., 2007.

373 To generate the constructs used for the analysis of promoter activity, the 500-nt sequence  
374 upstream of the ORF1, ORF2, ORF4, ORF5, ORF6/V3, and C4 ATG, or the 570-nt sequence  
375 upstream of the ORF3 ATG, were PCR-amplified and cloned into the pDONR<sup>TM</sup>/Zeo vector  
376 (Thermo Scientific). These sequences were then sub-cloned into pGWB504 (Nakagawa et al.,  
377 2007) by a Gateway LR reaction to generate pORF-GFP. In addition, the 833-nt sequence  
378 upstream of the V3/ORF6 ATG was PCR-amplified and cloned into pINT121-GUS digested with  
379 *HindIII* and *BamHI* to generate pINT121-V3-GUS (pV3-GUS), or into pCHF3-GFP digested with  
380 *EcoRI* and *SacI* to generate pCHF3-V3-GFP (pV3-GFP) using In-Fusion Cloning according to the  
381 manufacturer's instructions. The full-length V3 ORF was inserted into the PVX vector digested

382 with *ClaI* and *SaI* to generate PVX-V3. The pCHF3-35S-GFP, pCHF3-p19, PVX- $\beta$ C1, and a PVX-  
383 based expression vector for PTGS suppression assays have been described previously (Li et al.,  
384 2015; Xiong et al., 2009), as has the PVX-based expression vector PVX- $\beta$ C1 for TGS suppression  
385 assays (Yang et al., 2011). All primers used in this study can be found in Supplementary table 1.

### 386 **Sequence analysis**

387 The ViralORFinder platform was constructed by Shiny, an R package used to build interactive  
388 web applications (<https://shiny.rstudio.com>). The NCBI ORFinder  
389 (<https://www.ncbi.nlm.nih.gov/orffinder/>) was used to identify ORFs for each uploaded virus, and  
390 the R package Gviz (Hahne and Ivanek, 2016) was used for visualization; for Supplementary  
391 figures 1 and 3, 1.2-mer genomic sequences were used. To investigate the conservation of a  
392 ORF-encoded protein of choice, this tool creates a small database with the translated sequences  
393 from the inputted viral sequences, and BLASTp is used to identify proteins with high identity (e-  
394 value  $\leq 0.05$ ). Phylogenetic trees were obtained by the R package DECIPHER and visualized by  
395 ggtree. Multiple sequence alignments were constructed by ClustalW and visualized by the R  
396 package ggmsa (<https://cran.r-project.org/web/packages/ggmsa/vignettes/ggmsa.html>). Names  
397 and NCBI accession numbers of virus species used in this work are listed in Supplementary tables  
398 2-6.

### 399 **Prediction of domains or signals in protein sequences**

400 The prediction of transmembrane domains (TM) was performed by TMHMM  
401 (<http://www.cbs.dtu.dk/services/TMHMM/>) and Phobius (<https://phobius.sbc.su.se/>). The  
402 prediction of nuclear localization signal (NSL) was performed by cNLS Mapper ([http://nls-  
403 mapper.iab.keio.ac.jp/cgi-bin/NLS\\_Mapper\\_form.cgi](http://nls-mapper.iab.keio.ac.jp/cgi-bin/NLS_Mapper_form.cgi)); (Kosugi et al., 2009a; Kosugi et al., 2009b),  
404 The prediction of chloroplast transit peptide (cTP) was performed by ChloroP  
405 (<http://www.cbs.dtu.dk/services/ChloroP/>).

### 406 **Confocal microscopy**

407 Confocal microscopy was performed using a Leica TCS SP8 point scanning confocal microscope  
408 (Figure 2, 3h upper panel, Supplementary figures 8, 9, 10a, and 10d) or Zeiss LSM980 confocal  
409 microscope (Carl Zeiss) (Figure 3e, 3h lower panel, Supplementary figure 10b, c), with the preset  
410 settings for GFP (Ex: 488 nm, Em: 500-550 nm), RFP (Ex: 561 nm, Em: 570-620 nm), YFP  
411 (Ex :514 nm, Em: 515–570 nm), or mCherry (Ex: 594 nm, Em: 597–640 nm). For co-localization  
412 imaging, the sequential scanning mode was used.

### 413 **Mitochondrial staining**

414 To visualize mitochondria, staining with 250 nM MitoTracker® Red CMXRos (Invitrogen) was  
415 used. The chemical was infiltrated 10-30 min before imaging. The stock solution (1 mM) was  
416 prepared by dissolving the corresponding amount of MitoTracker® in dimethylsulfoxide (DMSO).  
417 The working solution was prepared by diluting the stock solution in water or infiltration buffer (10  
418 mM MgCl<sub>2</sub>, 10 mM MES (pH 5.6), and 100 µM acetosyringone). The MitoTracker® red  
419 fluorescence was imaged using a Leica TCS SP8 point scanning confocal microscope with the  
420 following settings: Ex: 561 nm, Em: 570-620 nm.

### 421 **DNA and RNA extraction and qPCR/qRT-PCR**

422 Total DNA was extracted from infected plants using the CTAB method. Total RNA was extracted  
423 from collected plant leaves using TaKaRa MiniBEST Universal RNA Extraction Kit (Takara,  
424 Japan). 1 µg of total RNA was reverse-transcribed into cDNA using PrimeScript™ RT reagent Kit  
425 with gDNA Eraser (Perfect Real Time) (Takara, Japan). qPCR or qRT-PCR was performed using  
426 TB Green® Premix Ex Taq™ II (Takara, Japan). 25S RNA and *NbActin2* were used as internal  
427 references for DNA and RNA normalization, respectively.

### 428 **5' rapid amplification of cDNA ends (RACE)**

429 Total RNA extracted from TYLCV (TYLCV-BJ, Accession No. MN432609)-infected *N.*  
430 *benthamiana* plants was used for 5' RACE with SMARTer RACE 5'/3' Kit (Takara, Japan)  
431 according to the manual booklet.

### 432 **3,3'-diaminobenzidine (DAB) staining**

433 For DAB staining, systemic leaves of infected plants were incubated in DAB solution (1 mg/mL,  
434 pH 3.8) for 10h at 25°C, then boiled for 5-10 min and decolorized in 95% ethanol.

### 435 **Protein extraction and western blotting**

436 Total protein was isolated from infiltrated leaf patches with protein extraction buffer (containing 50  
437 mM Tris-HCl (pH 6.8), 4.5% (m/v) SDS, 7.5% (v/v) 2-Mercaptoethanol, 9 M carbamide).  
438 Immunoblotting was performed with primary mouse polyclonal antibodies, followed by anti-mouse  
439 IgG HRP-linked antibodies (1:5000; Cell Signaling Technology, USA); primary antibodies used  
440 are as follows: anti-GFP (1:5000; ROCHE, USA), and custom-made anti-PVX CP (1:5000) and  
441 anti-TYLCV CP (1:5000) (Wu and Zhou, 2005; Wu et al., 2012).

442



## 443 ACKNOWLEDGEMENTS

444 This work was supported by the National Natural Science Foundation of China (31930089), the  
445 Strategic Priority Research Program of the Chinese Academy of Sciences (Grant  
446 No. XDB27040206), and the Shanghai Center for Plant Stress Biology from the Chinese Academy  
447 of Sciences. The authors thank all members of Rosa Lozano-Duran's lab and Alberto Macho's  
448 lab for fruitful discussions, Xinyu Jian, Aurora Luque, and the PSC Cell Biology Facility for  
449 technical assistance, Alberto Macho for critical reading of the manuscript, and Dr. Michael M.  
450 Goodin (University of Kentucky, USA) and Prof. David Baulcombe (University of Cambridge) for  
451 kindly sharing materials.

452

## 453 REFERENCES

- 454 Aguilar, E., Garnelo Gomez, B., and Lozano-Duran, R. (2020). Recent advances on the plant  
455 manipulation by geminiviruses. *Current Opinion in Plant Biology* 56, 56-64.
- 456 Azzam, O., Frazer, J., de la Rosa, D., Beaver, J.S., Ahlquist, P., and Maxwell, D.P. (1994). Whitefly  
457 transmission and efficient ssDNA accumulation of bean golden mosaic geminivirus require  
458 functional coat protein. *Virology* 204, 289-296.
- 459 Basak, J. (2016). Tomato yellow leaf curl virus: A serious threat to tomato plants world wide.  
460 *Journal of Plant Pathology & Microbiology* 7, 4.
- 461 Brito, A.F., and Pinney, J.W. (2017). Protein-Protein Interactions in Virus-Host Systems. *Frontiers*  
462 *in Microbiology* 8, 1557.
- 463 Burgyan, J., and Havelde, Z. (2011). Viral suppressors of RNA silencing. *Trends in Plant Science*  
464 16, 265-272.
- 465 Castillo, A.G., Collinet, D., Deret, S., Kashoggi, A., and Bejarano, E.R. (2003). Dual interaction of  
466 plant PCNA with geminivirus replication accessory protein (Ren) and viral replication protein  
467 (Rep). *Virology* 312, 381-394.
- 468 Derrien, B., Baumberger, N., Schepetilnikov, M., Viotti, C., De Cillia, J., Ziegler-Graff, V., Isono,  
469 E., Schumacher, K., and Genschik, P. (2012). Degradation of the antiviral component  
470 ARGONAUTE1 by the autophagy pathway. *Proceedings of the National Academy of*  
471 *Sciences of the United States of America* 109, 15942-15946.
- 472 Diaz-Pendon, J.A., Canizares, M.C., Moriones, E., Bejarano, E.R., Czosnek, H., and Navas-  
473 Castillo, J. (2010). Tomato yellow leaf curl viruses: menage a trois between the virus  
474 complex, the plant and the whitefly vector. *Molecular Plant Pathology* 11, 441-450.
- 475 Ding, S.W. (2010). RNA-based antiviral immunity. *Nature Reviews Immunology* 10, 632-644.
- 476 Ding, S.W., Li, H., Lu, R., Li, F., and Li, W.X. (2004). RNA silencing: a conserved antiviral immunity  
477 of plants and animals. *Virus Research* 102, 109-115.
- 478 Earley, K.W., Haag, J.R., Pontes, O., Opper, K., Juehne, T., Song, K., and Pikaard, C.S. (2006).  
479 Gateway-compatible vectors for plant functional genomics and proteomics. *Plant Journal* y  
480 45, 616-629.
- 481 Eguen, T., Straub, D., Graeff, M., and Wenkel, S. (2015). MicroProteins: small size-big impact.  
482 *Trends in Plant Science* 20, 477-482.
- 483 Gotz, M., Popovski, S., Kollenberg, M., Gorovits, R., Brown, J.K., Cicero, J.M., Czosnek, H.,  
484 Winter, S., and Ghanim, M. (2012). Implication of *Bemisia tabaci* heat shock protein 70 in  
485 begomovirus-whitefly interactions. *Journal of Virology* 86, 13241-13252.

- 486 Hahne, F., and Ivanek, R. (2016). Visualizing genomic data using gviz and bioconductor. .  
487 Methods in Molecular Biology 1418, 335–351.
- 488 Hanley-Bowdoin, L., Bejarano, E.R., Robertson, D., and Mansoor, S. (2013). Geminiviruses:  
489 masters at redirecting and reprogramming plant processes. Nature Reviews Microbiology  
490 11, 777-788.
- 491 Hsu, P.Y., and Benfey, P.N. (2018). Small but mighty: Functional peptides encoded by small ORFs  
492 in plants. Proteomics 18, e1700038.
- 493 Jin, Y., Zhao, J.H., and Guo, H.S. (2020). Recent advances in understanding plant antiviral RNAi  
494 and viral suppressors of RNAi. Current Opinion in Virology 46, 65-72.
- 495 Jouannet, V., Moreno, A.B., Elmayan, T., Vaucheret, H., Crespi, M.D., and Maizel, A. (2012).  
496 Cytoplasmic *Arabidopsis* AGO7 accumulates in membrane-associated siRNA bodies and  
497 is required for ta-siRNA biogenesis. EMBO Journal 31, 1704-1713.
- 498 King, C.R., Zhang, A., Tessier, T.M., Gameiro, S.F., and Mymryk, J.S. (2018). Hacking the cell:  
499 Network intrusion and exploitation by adenovirus E1A. mBio 9, e00390-18.
- 500 Kosugi, S., Hasebe, M., Matsumura, N., Takashima, H., Miyamoto-Sato, E., Tomita, M., and  
501 Yanagawa, H. (2009a). Six classes of nuclear localization signals specific to different  
502 binding grooves of importin alpha. Journal of Biological Chemistry 284, 478-485.
- 503 Kosugi, S., Hasebe, M., Tomita, M., and Yanagawa, H. (2009b). Systematic identification of cell  
504 cycle-dependent yeast nucleocytoplasmic shuttling proteins by prediction of composite  
505 motifs. Proceedings of the National Academy of Sciences of the United States of America  
506 106, 10171-10176.
- 507 Kumar, R.V. (2019). Plant antiviral immunity against geminiviruses and viral counter-defense for  
508 survival. Frontiers in Microbiology 10, 1460.
- 509 Kunik, T., Palanichelvam, K., Czosnek, H., Citovsky, V., and Gafni, Y. (1998). Nuclear import of  
510 the capsid protein of tomato yellow leaf curl virus (TYLCV) in plant and insect cells. Plant  
511 Journal 13, 393-399.
- 512 Li, F., Xu, X., Huang, C., Gu, Z., Cao, L., Hu, T., Ding, M., Li, Z., and Zhou, X. (2015). The AC5  
513 protein encoded by mungbean yellow mosaic India virus is a pathogenicity determinant that  
514 suppresses RNA silencing-based antiviral defenses. New Phytologist 208, 555-569.
- 515 Lin, W., Qiu, P., Jin, J., Liu, S., Ul Islam, S., Yang, J., Zhang, J., Kormelink, R., Du, Z., and Wu, Z.  
516 (2017). The cap snatching of segmented negative sense RNA viruses as a tool to map the  
517 transcription start sites of heterologous co-infecting viruses. Frontiers in Microbiology 8,  
518 2519.
- 519 Liu, X., Huang, W., Zhai, Z., Ye, T., Yang, C., and Lai, J. (2021). Protein modification: a critical  
520 modulator in the interaction between geminiviruses and host plants. Plant, Cell &  
521 Environment doi: 10.1111/pce.14008.
- 522 Liu, Y., Zhang, C., Wang, D., Su, W., Liu, L., Wang, M., and Li, J. (2015). EBS7 is a plant-specific  
523 component of a highly conserved endoplasmic reticulum-associated degradation system in  
524 *Arabidopsis*. Proceedings of the National Academy of Sciences of the United States of  
525 America 112, 12205-12210.
- 526 Lozano-Duran, R., Rosas-Diaz, T., Gusmaroli, G., Luna, A.P., Taconnat, L., Deng, X.W., and  
527 Bejarano, E.R. (2011). Geminiviruses subvert ubiquitination by altering CSN-mediated  
528 derubylation of SCF E3 ligase complexes and inhibit jasmonate signaling in *Arabidopsis*  
529 *thaliana*. Plant Cell 23, 1014-1032.
- 530 Luna, A.P., Morilla, G., Voinnet, O., and Bejarano, E.R. (2012). Functional analysis of gene-  
531 silencing suppressors from tomato yellow leaf curl disease viruses. Molecular Plant-Microbe  
532 Interactions 25, 1294-1306.
- 533 Martin, K., Kopperud, K., Chakrabarty, R., Banerjee, R., Brooks, R., and Goodin, M.M. (2009).  
534 Transient expression in *Nicotiana benthamiana* fluorescent marker lines provides enhanced  
535 definition of protein localization, movement and interactions in planta. Plant Journal 59, 150-  
536 162.

- 537 Medina-Puche, L., Tan, H., Dogra, V., Wu, M., Rosas-Diaz, T., Wang, L., Ding, X., Zhang, D., Fu,  
538 X., Kim, C., *et al.* (2020). A defense pathway linking plasma membrane and chloroplasts  
539 and co-opted by pathogens. *Cell* 182, 1109-1124 e25.
- 540 Murphy, E., Smith, S., and De Smet, I. (2012). Small signaling peptides in *Arabidopsis*  
541 development: how cells communicate over a short distance. *Plant Cell* 24, 3198-3217.
- 542 Nakagawa, T., Suzuki, T., Murata, S., Nakamura, S., Hino, T., Maeo, K., Tabata, R., Kawai, T.,  
543 Tanaka, K., Niwa, Y., *et al.* (2007). Improved gateway binary vectors: high-performance  
544 vectors for creation of fusion constructs in transgenic analysis of plants. *Bioscience,*  
545 *Biotechnology, and Biochemistry* 71, 2095-2100.
- 546 Nelson, B.K., Cai, X., and Nebenfuhr, A. (2007). A multicolored set of in vivo organelle markers  
547 for co-localization studies in *Arabidopsis* and other plants. *Plant Journal* 51, 1126-1136.
- 548 Ohnesorge, S., and Bejarano, E.R. (2009). Begomovirus coat protein interacts with a small heat-  
549 shock protein of its transmission vector (*Bemisia tabaci*). *Insect Molecular Biology* 18, 693-  
550 703.
- 551 Palanichelvam, K., Kunik, T., Citovsky, V., and Gafni, Y. (1998). The capsid protein of tomato  
552 yellow leaf curl virus binds cooperatively to single-stranded DNA. *Journal of General*  
553 *Virology* 79, 2829-2833.
- 554 Rodriguez-Negrete, E., Lozano-Duran, R., Piedra-Aguilera, A., Cruzado, L., Bejarano, E.R., and  
555 Castillo, A.G. (2013). Geminivirus Rep protein interferes with the plant DNA methylation  
556 machinery and suppresses transcriptional gene silencing. *New Phytologist* 199, 464-475.
- 557 Rojas, M.R., Jiang, H., Salati, R., Xoconostle-Cazares, B., Sudarshana, M.R., Lucas, W.J., and  
558 Gilbertson, R.L. (2001). Functional analysis of proteins involved in movement of the  
559 monopartite begomovirus, tomato yellow leaf curl virus. *Virology* 291, 110-125.
- 560 Rosas-Diaz, T., Macho, A.P., Beuzon, C.R., Lozano-Duran, R., and Bejarano, E.R. (2016). The  
561 C2 protein from the geminivirus tomato yellow leaf curl Sardinia virus decreases sensitivity  
562 to jasmonates and suppresses jasmonate-mediated defences. *Plants* 5, 8.
- 563 Rosas-Diaz, T., Zhang, D., Fan, P., Wang, L., Ding, X., Jiang, Y., Jimenez-Gongora, T., Medina-  
564 Puche, L., Zhao, X., Feng, Z., *et al.* (2018). A virus-targeted plant receptor-like kinase  
565 promotes cell-to-cell spread of RNAi. *Proceedings of the National Academy of Sciences of*  
566 *the United States of America* 115, 1388-1393.
- 567 Rubinstein, G., and Czosnek, H. (1997). Long-term association of tomato yellow leaf curl virus  
568 with its whitefly vector *Bemisia tabaci*: effect on the insect transmission capacity, longevity  
569 and fecundity. *Journal of General Virology* 78, 2683-2689.
- 570 Ruiz, M.T., Voinnet, O., and Baulcombe, D.C. (1998). Initiation and maintenance of virus-induced  
571 gene silencing. *Plant Cell* 10, 937-946.
- 572 Settlege, S.B., See, R.G., and Hanley-Bowdoin, L. (2005). Geminivirus C3 protein: replication  
573 enhancement and protein interactions. *Journal of Virology* 79, 9885-9895.
- 574 Stewart, F.J., Panne, D., Bickle, T.A., and Raleigh, E.A. (2000). Methyl-specific DNA binding by  
575 McrBC, a modification-dependent restriction enzyme. *Journal of Molecular Biology* 298,  
576 611-622.
- 577 Wang, B., Li, F., Huang, C., Yang, X., Qian, Y., Xie, Y., and Zhou, X. (2014). V2 of tomato yellow  
578 leaf curl virus can suppress methylation-mediated transcriptional gene silencing in plants.  
579 *Journal of General Virology* 95, 225-230.
- 580 Wang, B., Yang, X., Wang, Y., Xie, Y., and Zhou, X. (2018). Tomato yellow leaf curl virus V2  
581 interacts with host histone deacetylase 6 to suppress methylation-mediated transcriptional  
582 gene silencing in plants. *Journal of Virology* 92, e00036-18.
- 583 Wang, C., Wang, C., Zou, J., Yang, Y., Li, Z., and Zhu, S. (2019). Epigenetics in the plant-virus  
584 interaction. *Plant Cell Reports* 38, 1031-1038.
- 585 Wang, L., Ding, Y., He, L., Zhang, G., Zhu, J.K., and Lozano-Duran, R. (2020). A virus-encoded  
586 protein suppresses methylation of the viral genome through its interaction with AGO4 in the  
587 Cajal body. *eLife* 9, e55542.

- 588 Wu, J., and Zhou, X. (2005). Production and application of monoclonal antibodies against  
589 potatovirus X. *Journal of Zhejiang University B* 31, 608-612.
- 590 Wu, J.X., Shang, H.L., Xie, Y., and Zhou, X.P. (2012). Monoclonal antibodies against the whitefly-  
591 transmitted tomato yellow leaf curl virus and their application in virus detection. *Journal of*  
592 *Integrative Agriculture* 11, 263–268.
- 593 Wu, M., W, H., Tan, H., Pan, S., Liu, Q., Bejarano, E.R., and Lozano-Durán, R. (2020). Plant DNA  
594 polymerases alpha and delta mediate replication of geminiviruses. *bioRxiv*  
595 <https://doi.org/10.1101/2020.07.20.212167>
- 596 Yang, X., Xie, Y., Raja, P., Li, S., Wolf, J.N., Shen, Q., Bisaro, D.M., and Zhou, X. (2011).  
597 Suppression of methylation-mediated transcriptional gene silencing by betaC1-SAHH  
598 protein interaction during geminivirus-betasatellite infection. *PLoS Pathogens* 7, e1002329.
- 599 Zerbini, F.M., Briddon, R.W., Idris, A., Martin, D.P., Moriones, E., Navas-Castillo, J., Rivera-  
600 Bustamante, R., Roumagnac, P., Varsani, A., and Ictv Report, C. (2017). ICTV virus  
601 taxonomypProfile: *Geminiviridae*. *Journal of General Virology* 98, 131-133.
- 602 Zhao, W., Wu, S., Barton, E., Fan, Y., Ji, Y., Wang, X., and Zhou, Y. (2020). Tomato yellow leaf  
603 curl virus V2 protein plays a critical role in the nuclear export of V1 protein and viral systemic  
604 infection. *Frontiers in Microbiology* 11, 1243.
- 605 Zheng, X., Fahlgren, N., Abbasi, A., Berry, J.C., and Carrington, J.C. (2019). Antiviral  
606 ARGONAUTES against turnip crinkle virus revealed by image-based trait analysis. *Plant*  
607 *Physiology* 180, 1418-1435.
- 608 Zrachya, A., Glick, E., Levy, Y., Arazi, T., Citovsky, V., and Gafni, Y. (2007). Suppressor of RNA  
609 silencing encoded by tomato yellow leaf curl virus-Israel. *Virology* 358, 159-165.
- 610

611

612 **FIGURES AND FIGURE LEGENDS**

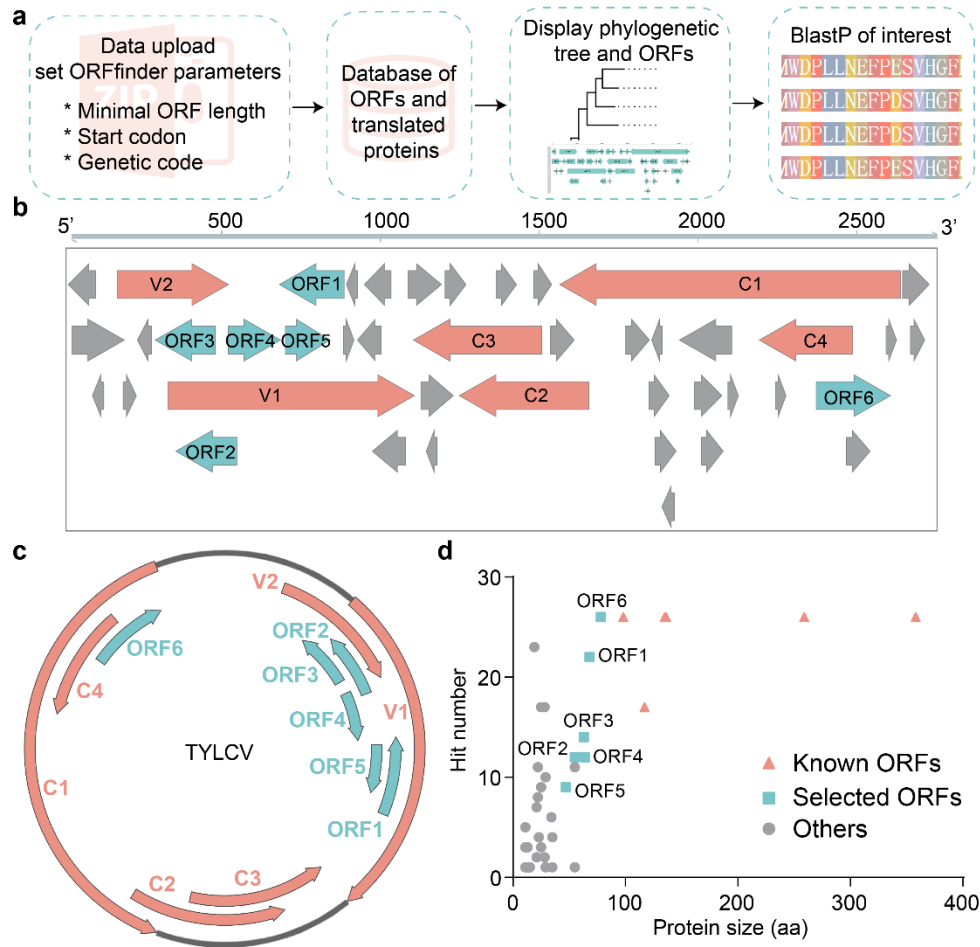

613

614 **Figure 1. The TYLCV genome contains additional conserved open reading frames.** a.  
 615 Working pipeline of ViralORFfinder, a web-based tool for ORF prediction and protein conservation  
 616 analysis. b. Schematic view of predicted ORFs ( $\geq 30$  nt) in the TYLCV genome. c. Genome  
 617 organization of TYLCV; arrows indicate ORFs. In b and c, pink arrows represent the six known  
 618 ORFs (C1, C2, C3, C4, V1, and V2), while blue arrows represent the six new ORFs described in  
 619 this work (ORF1-6). d. Correlation between the size of proteins encoded by the ORFs in the  
 620 TYLCV genome and their representation in the selected subset of begomoviruses (see  
 621 Supplementary table 6). The TYLCV isolate used in these experiments is TYLCV-Alm.

622



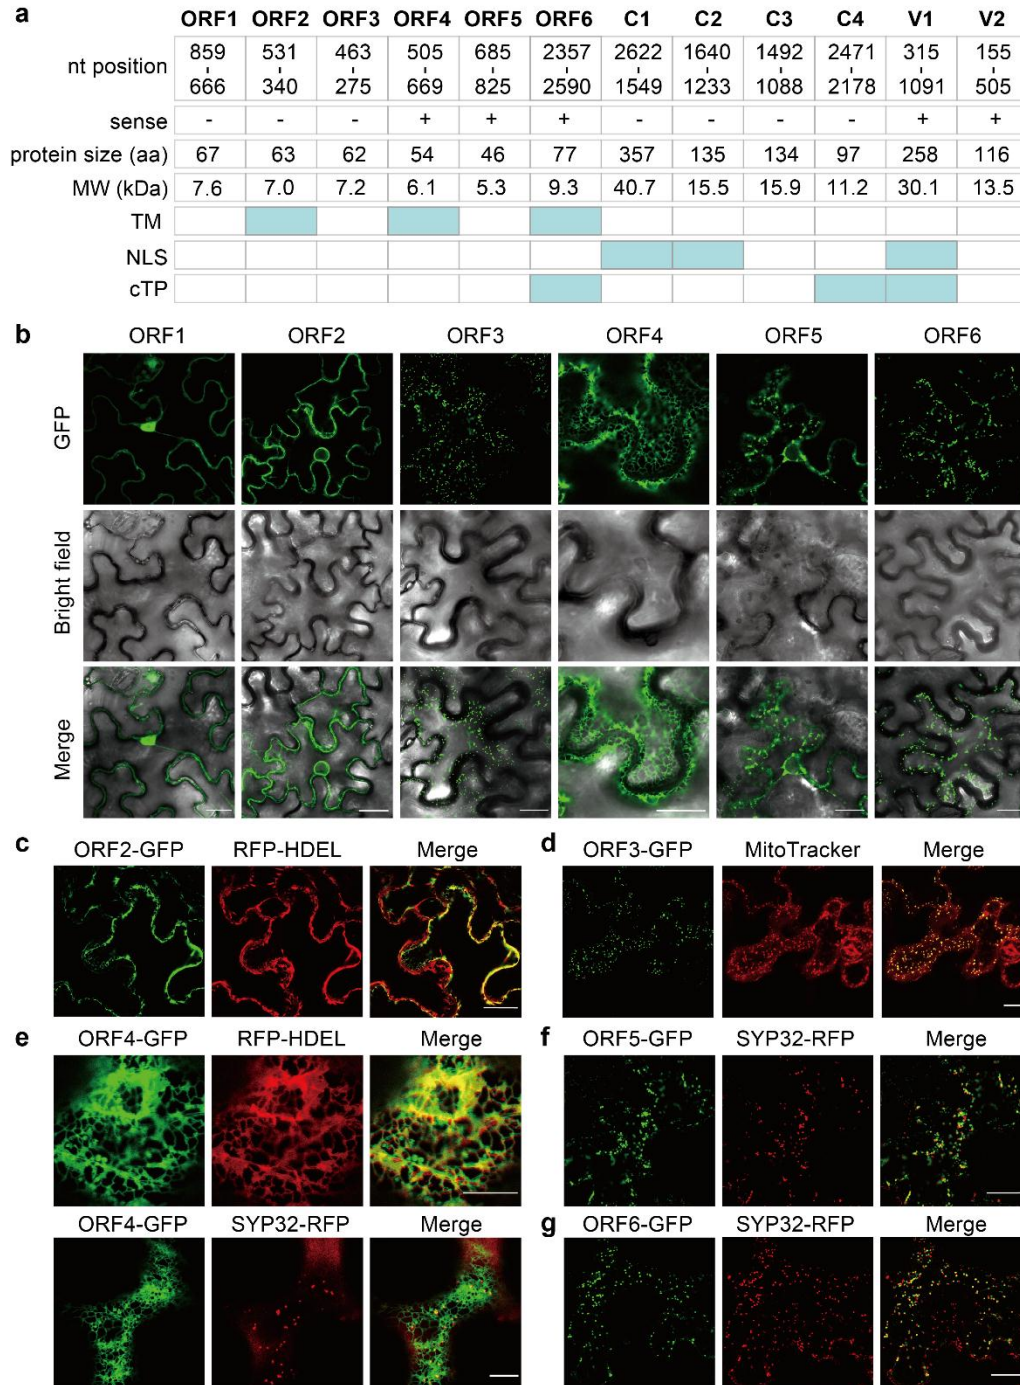

623

624

625 **Figure 2. The novel open reading frames in the TYLCV genome encode proteins with**  
 626 **predicted domains and specific subcellular localizations.** a. Nucleotide position of the six  
 627 novel ORFs and the six known ORFs in the TYLCV genome, size (in aa) and predicted molecular  
 628 weight (MW; in kDa) of the corresponding encoded proteins, and domains or signals predicted in



629 the proteins sequence. TM: transmembrane domain; NLS: nuclear localization signal; cTP:  
630 chloroplast transit peptide. b. Subcellular localization of the proteins encoded by ORF1-6 fused  
631 to GFP at their C-terminus transiently expressed in *N. benthamiana* leaves. Scale bar: 25  $\mu\text{m}$ . c.  
632 Co-localization of ORF2-GFP with the ER marker RFP-HDEL. Scale bar: 25  $\mu\text{m}$ . d. Co-localization  
633 of ORF3-GFP with the mitochondrial stain MitoTracker Red. Scale bar: 25  $\mu\text{m}$ . e. Co-localization  
634 of ORF4-GFP with the ER marker RFP-HDEL and the cis-Golgi marker SYP32-RFP. Scale bar:  
635 10  $\mu\text{m}$ . f. Co-localization of ORF5-GFP with the cis-Golgi marker SYP32-RFP. Scale bar: 25  $\mu\text{m}$ .  
636 g. Co-localization of ORF6-GFP with the cis-Golgi marker SYP32-RFP. Scale bar: 25  $\mu\text{m}$ . b-g.  
637 These experiments were repeated at least three times with similar results; representative images  
638 are shown. The TYLCV isolate used in these experiments is TYLCV-Alm.

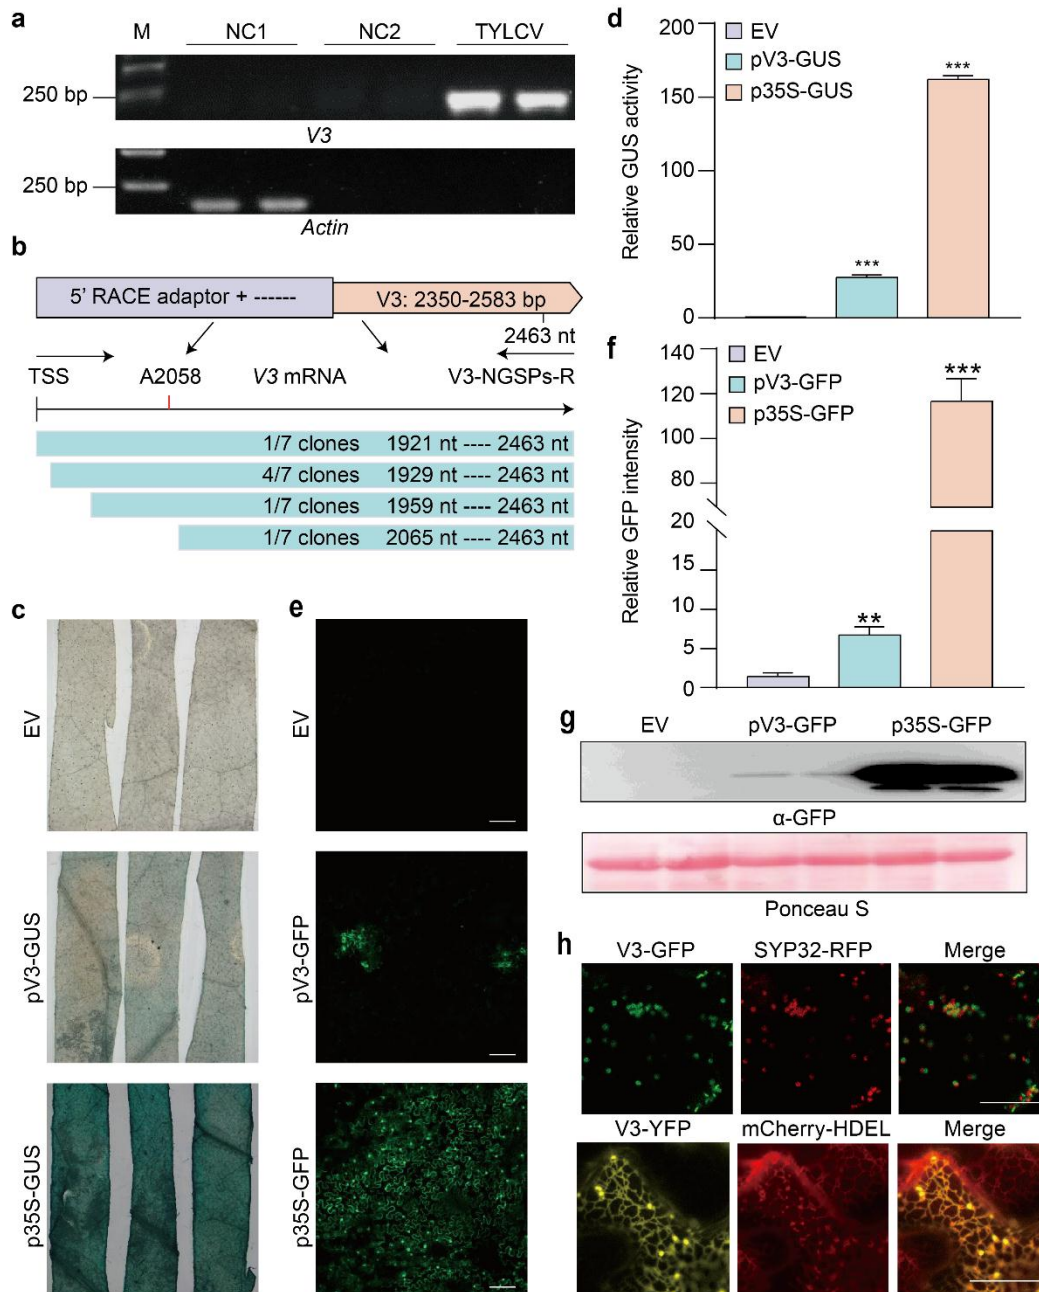

639

640

641 **Figure 3. ORF6/V3 is expressed during the infection and encodes a Golgi-localized protein.**

642 a. RT-PCR analysis of V3 transcripts from TYLCV-infected or uninfected *N. benthamiana* plants.

643 M: DNA ladder marker. NC1: negative control 1 (reverse-transcription of total RNA extracted from

644 uninfected plants with RT Primers). NC2: negative control 2 (reverse-transcription of total RNA

645 extracted from uninfected plants with V3-specific primers). TYLCV: reverse-transcription of total

646 RNA extracted from TYLCV-infected plants with V3-specific primers. b. Transcriptional start site

647 analysis of TYLCV V3 by 5' RACE. TSS: transcription start site. A2058: V3 TSS captured by RSV  
648 cap-snatching (Lin et al., 2017). c. Activity of pV3 promoter (and p35S promoter as positive control)  
649 in promoter-GUS fusions in transiently transformed *N. benthamiana* leaves at 2 dpi. EV: empty  
650 vector. d. Quantification of relative GUS activity in samples from (c). Error bars represent SD of  
651 n=3. Asterisks indicate a statistically significant difference according to Student's t-test, \*\*\* p <  
652 0.001. e. Activity of pV3 promoter (and p35S promoter as positive control) in promoter-GFP  
653 fusions in transiently transformed *N. benthamiana* leaves at 2 dpi. Scale bar: 100  $\mu$ m. EV: empty  
654 vector. f. Quantification of relative GFP intensity in samples from (e). Error bars represent SD of  
655 n=3. Asterisks indicate a statistically significant difference according to Student's t-test, \*\* p <  
656 0.01, \*\*\* p < 0.001. g. Western blot analysis of GFP protein from (e). Ponceau S staining of the  
657 large RuBisCO subunit serves as loading control. EV: empty vector. h. Co-localization of V3-GFP  
658 with the cis-Golgi marker SYP32-RFP (upper panel) and co-localization of V3-YFP with the ER  
659 marker mCherry-HDEL (lower panel). Scale bar: 20  $\mu$ m. The TYLCV isolate used in these  
660 experiments is TYLCV-BJ.

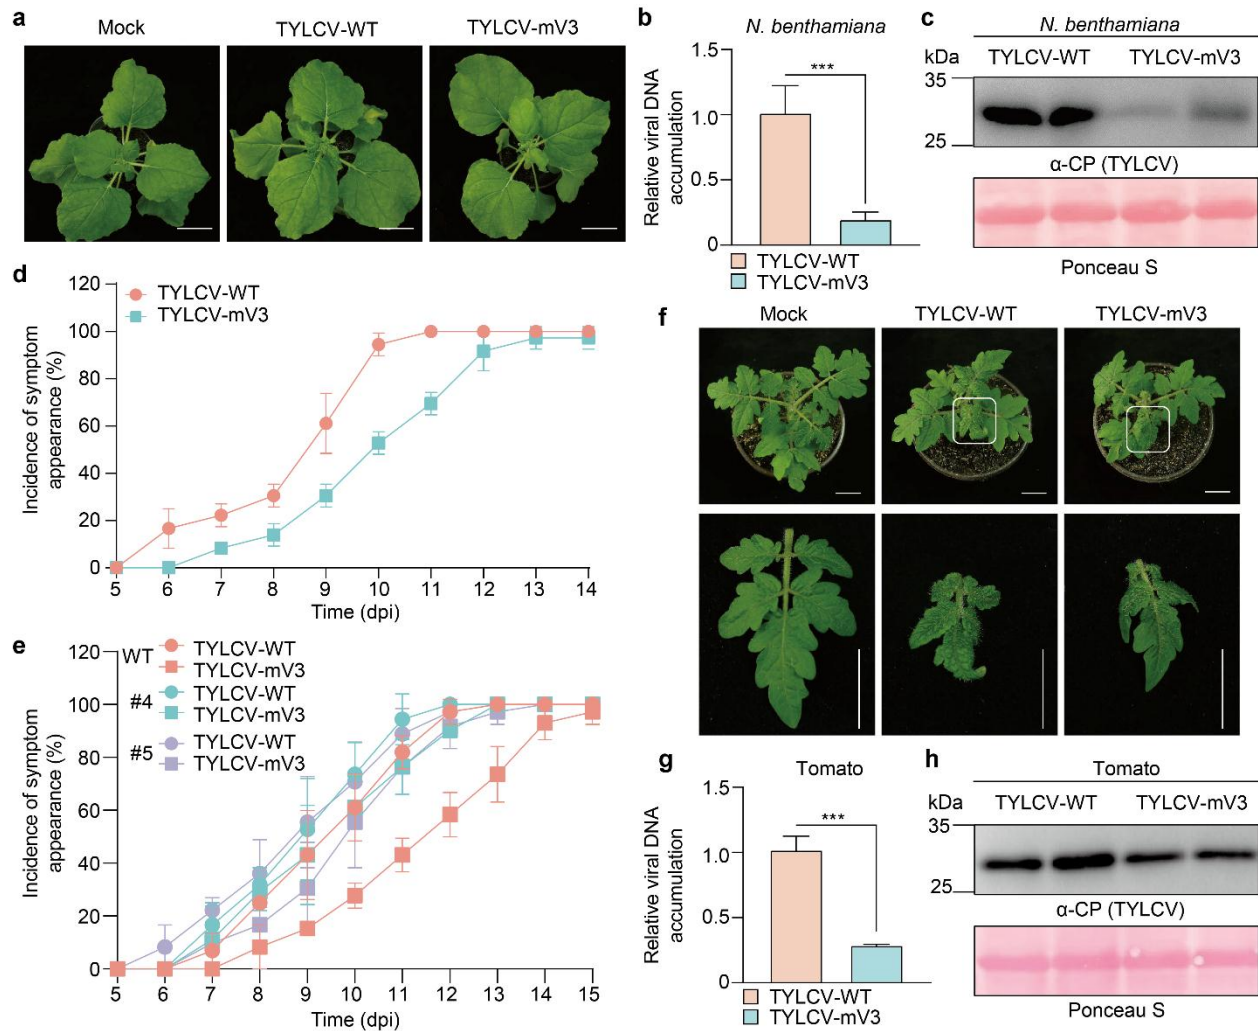

661

662

663 **Figure 4. V3 is required for full TYLCV infection in *N. benthamiana* and tomato.** a. Symptoms  
 664 of *N. benthamiana* plants inoculated with wild-type TYLCV (TYLCV-WT), a V3 null mutant TYLCV  
 665 (TYLCV-mV3), or mock-inoculated (pCAMBIA2300 empty vector), at 10 dpi. Bar = 2 cm. b. Viral  
 666 DNA accumulation in TYLCV-WT- and TYLCV-mV3-infected plants in (a), measured by qPCR.  
 667 Error bars represent means  $\pm$  SD of  $n=3$ . Asterisks indicate a statistically significant difference  
 668 according to Student's t-test, \*\*\*  $p<0.001$ . 25S RNA was used as internal reference. c. Western  
 669 blot showing TYLCV CP accumulation in systemic leaves of TYLCV-WT- and TYLCV-mV3-  
 670 infected plants from (a). Ponceau S staining of the large RuBisCO subunit serves as loading  
 671 control. d, e. Incidence of symptom appearance in WT (d, e) or V3 transgenic (e) *N. benthamiana*  
 672 plants infected with TYLCV-WT or TYLCV-mV3. Error bars represent means  $\pm$  SD from three  
 673 independent experiments; at least 8 plants were used per viral genotype and experiment. For

674 images of symptoms in the V3 transgenic lines, see Supplementary figure 10d. f. Symptoms of  
675 tomato plants inoculated with WT TYLCV (TYLCV-WT), a V3 null mutant TYLCV (TYLCV-mV3),  
676 or mock-inoculated (pCAMBIA2300 empty vector), at 10 dpi. Bar = 2 cm. g. Viral DNA  
677 accumulation in TYLCV-WT- and TYLCV-mV3-infected plants from (f), measured by qPCR. Error  
678 bars represent means  $\pm$  SD of n=3. Asterisks indicate a statistically significant difference  
679 according to Student's t-test, \*\*\*  $p < 0.001$ . 25S RNA was used as internal reference. h. Western  
680 blot showing TYLCV CP accumulation in systemic leaves of TYLCV-WT- and TYLCV-mV3-  
681 infected plants from (f). Ponceau S staining of the large RuBisCO subunit serves as loading  
682 control. The TYLCV isolate used in these experiments is TYLCV-BJ.



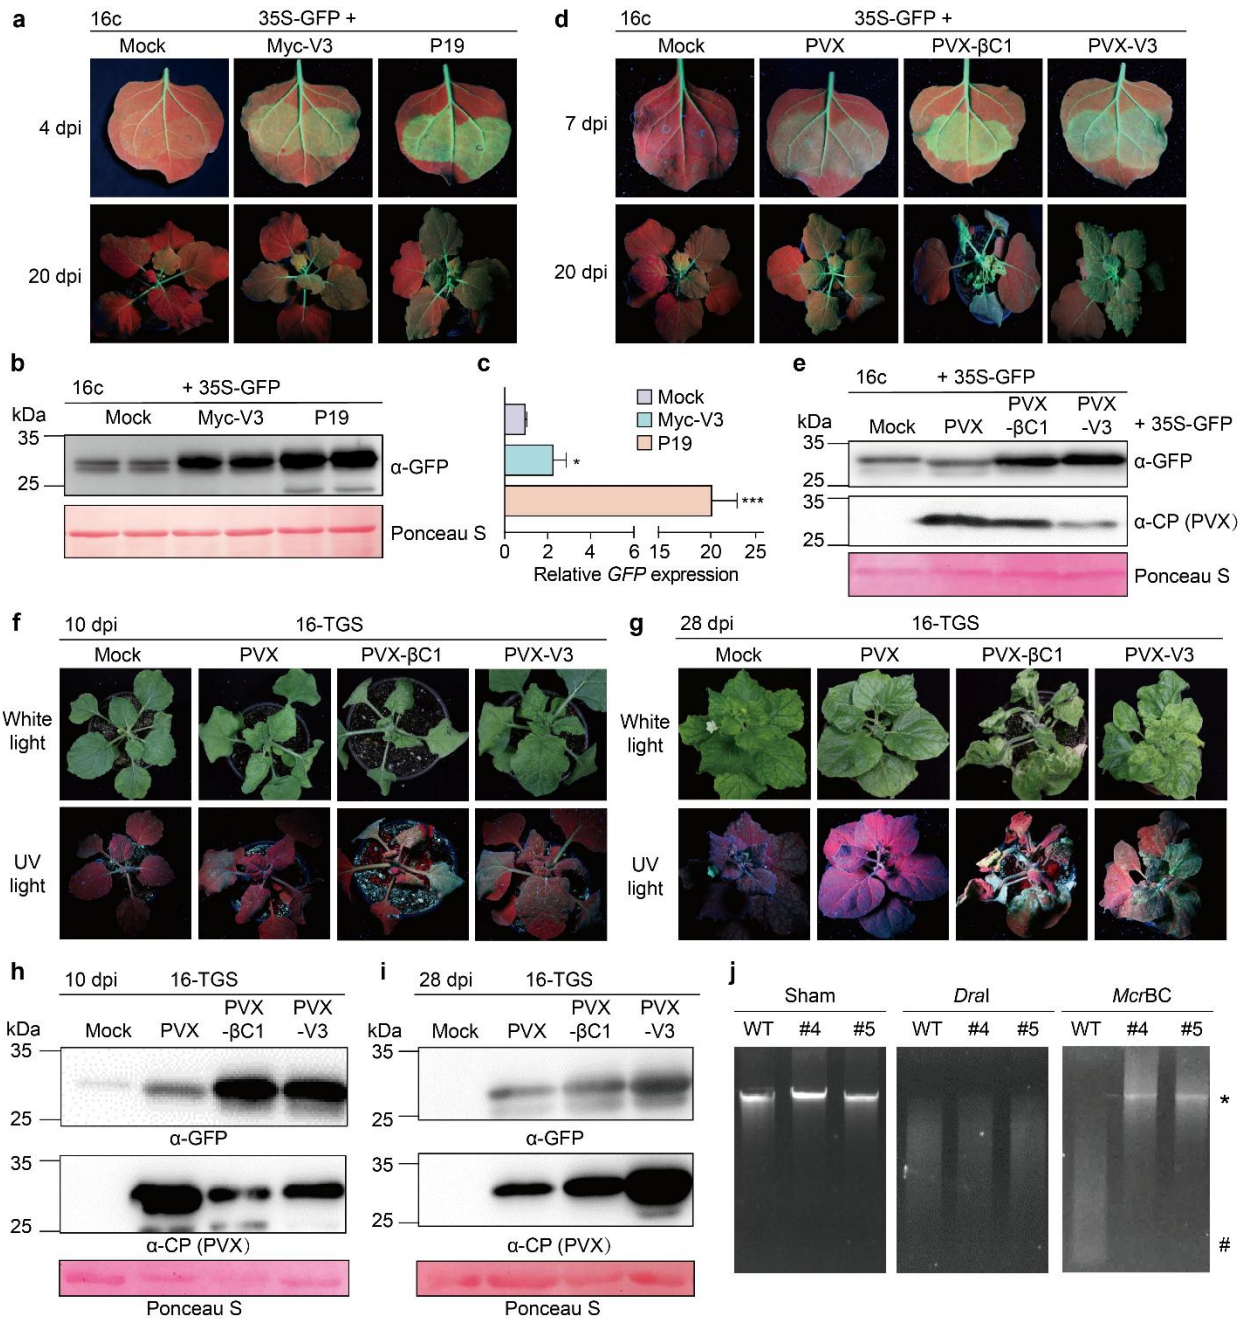

683

684 **Figure 5. V3 functions as a suppressor of PTGS and TGS.** a. Transgenic 16c *N. benthamiana*  
 685 plants co-infiltrated with constructs to express GFP (35S-GFP) and Myc-V3, P19 (as positive  
 686 control), or mock (empty vector, as negative control) at 4 dpi (upper panel) or 20 dpi (lower panel)  
 687 under UV light. b. Western blot showing the GFP accumulation in inoculated leaves from (a) at 4  
 688 dpi. The corresponding Ponceau S staining of the large RuBisCO subunit serves as a loading  
 689 control. c. Relative GFP mRNA accumulation in inoculated leaves from (a) at 4 dpi measured by  
 690 qRT-PCR. Error bars represent means  $\pm$  SD of  $n=3$ . Asterisks indicate a statistically significant



691 difference according to Student's t-test, \*  $p < 0.5$ , \*\*\*  $p < 0.001$ . *NbActin2* was used as the internal  
692 reference. d. Transgenic 16c *N. benthamiana* plants co-infiltrated with constructs to express GFP  
693 (35S-GFP) and PVX, PVX-V3, PVX- $\beta$ C1 (as positive control), or mock (infiltration buffer, as  
694 negative control) at 7 dpi (upper panel) or 20 dpi (lower panel) under UV light. e. Western blot  
695 showing the GFP accumulation in inoculated leaves from (d) at 7 dpi. The corresponding Ponceau  
696 S staining of the large RuBisCO subunit serves as a loading control. f, g. Symptoms of 16-TGS  
697 *N. benthamiana* plants infected with PVX, PVX-V3, PVX- $\beta$ C1 (as positive control), or mock-  
698 inoculated under white light or UV light at 10 dpi (f) and 28 dpi (g). h. i. Western blot showing  
699 accumulation of GFP and PVX CP in systemically infected leaves from (f) and (i). The  
700 corresponding Ponceau S staining of the large RuBisCO subunit serves as loading control. j. DNA  
701 methylation analysis by restriction enzyme digestion in V3-YFP transgenic *N. benthamiana* plants.  
702 Genomic DNA extracted from WT *N. benthamiana* or two independent V3-YFP transgenic lines  
703 (#4 and #5) was digested with the methylation-dependent restriction enzyme *McrBC* and the  
704 methylation-insensitive enzyme *DraI*. 'Sham' indicates a mock digestion with no enzyme added.  
705 The positions of undigested input genomic DNA is indicated with an asterisk; the position of the  
706 *McrBC*-digested products is indicated with a hashtag.

707

708

709 **SUPPLEMENTARY MATERIAL**

710 • Supplementary figures 1-12

711 • Supplementary tables 1-6
